# Supplementary material
Source: PubMed Central journal article supplement (PMC3695742)

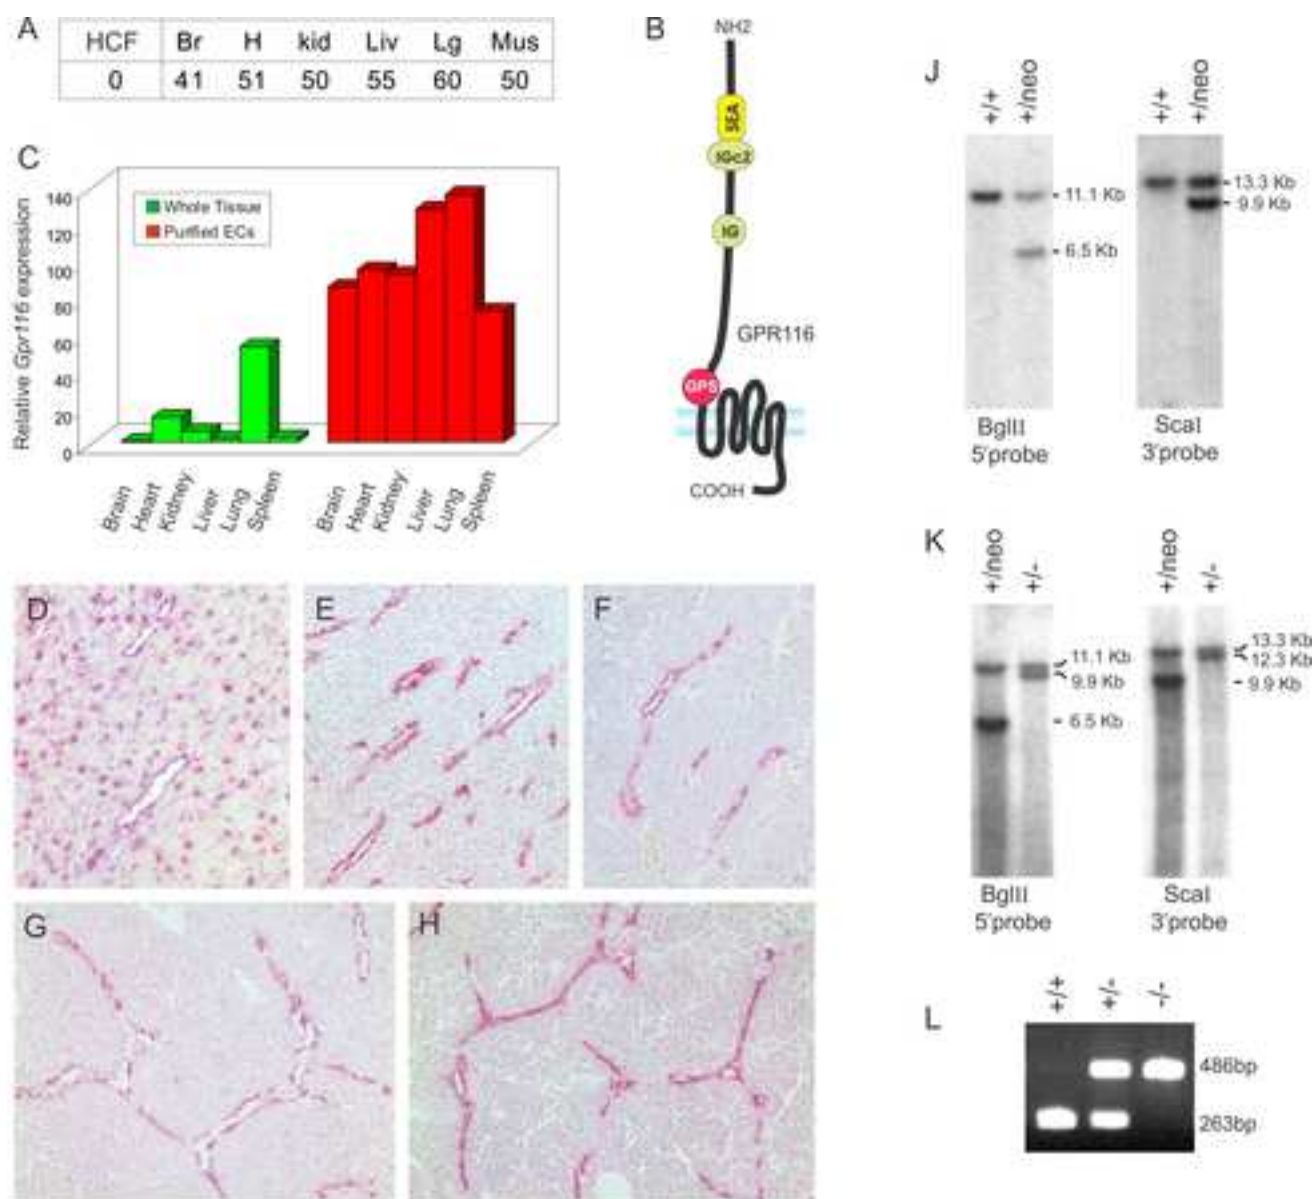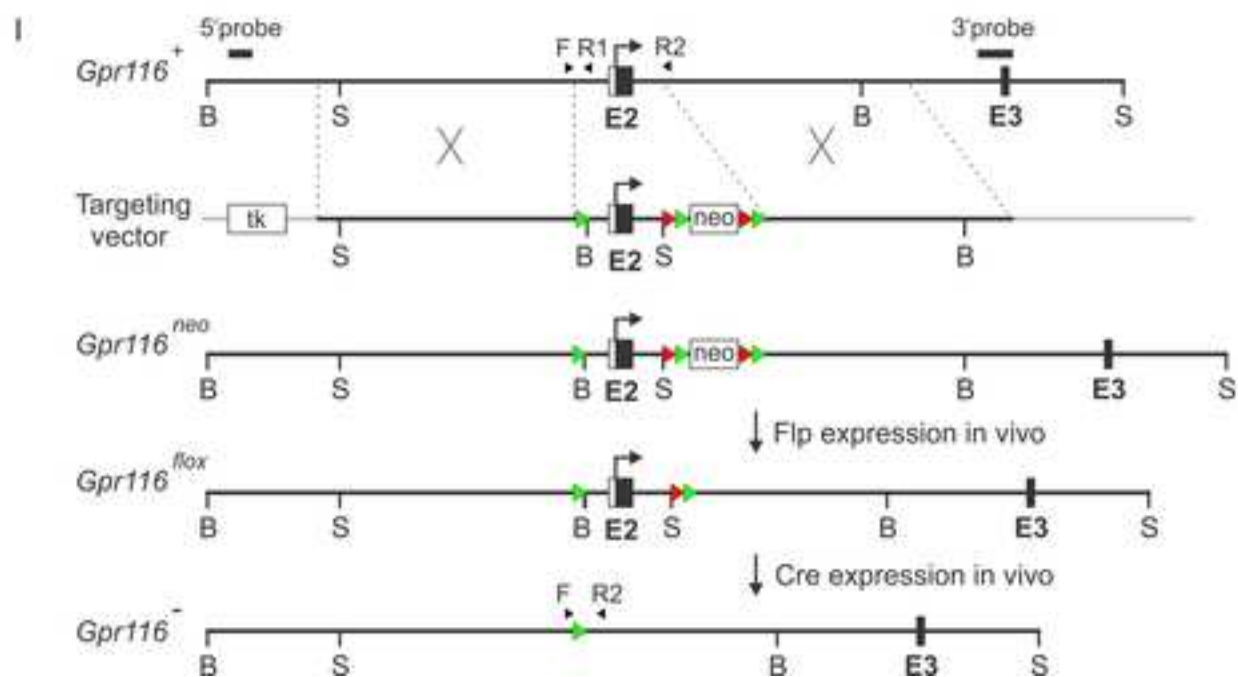

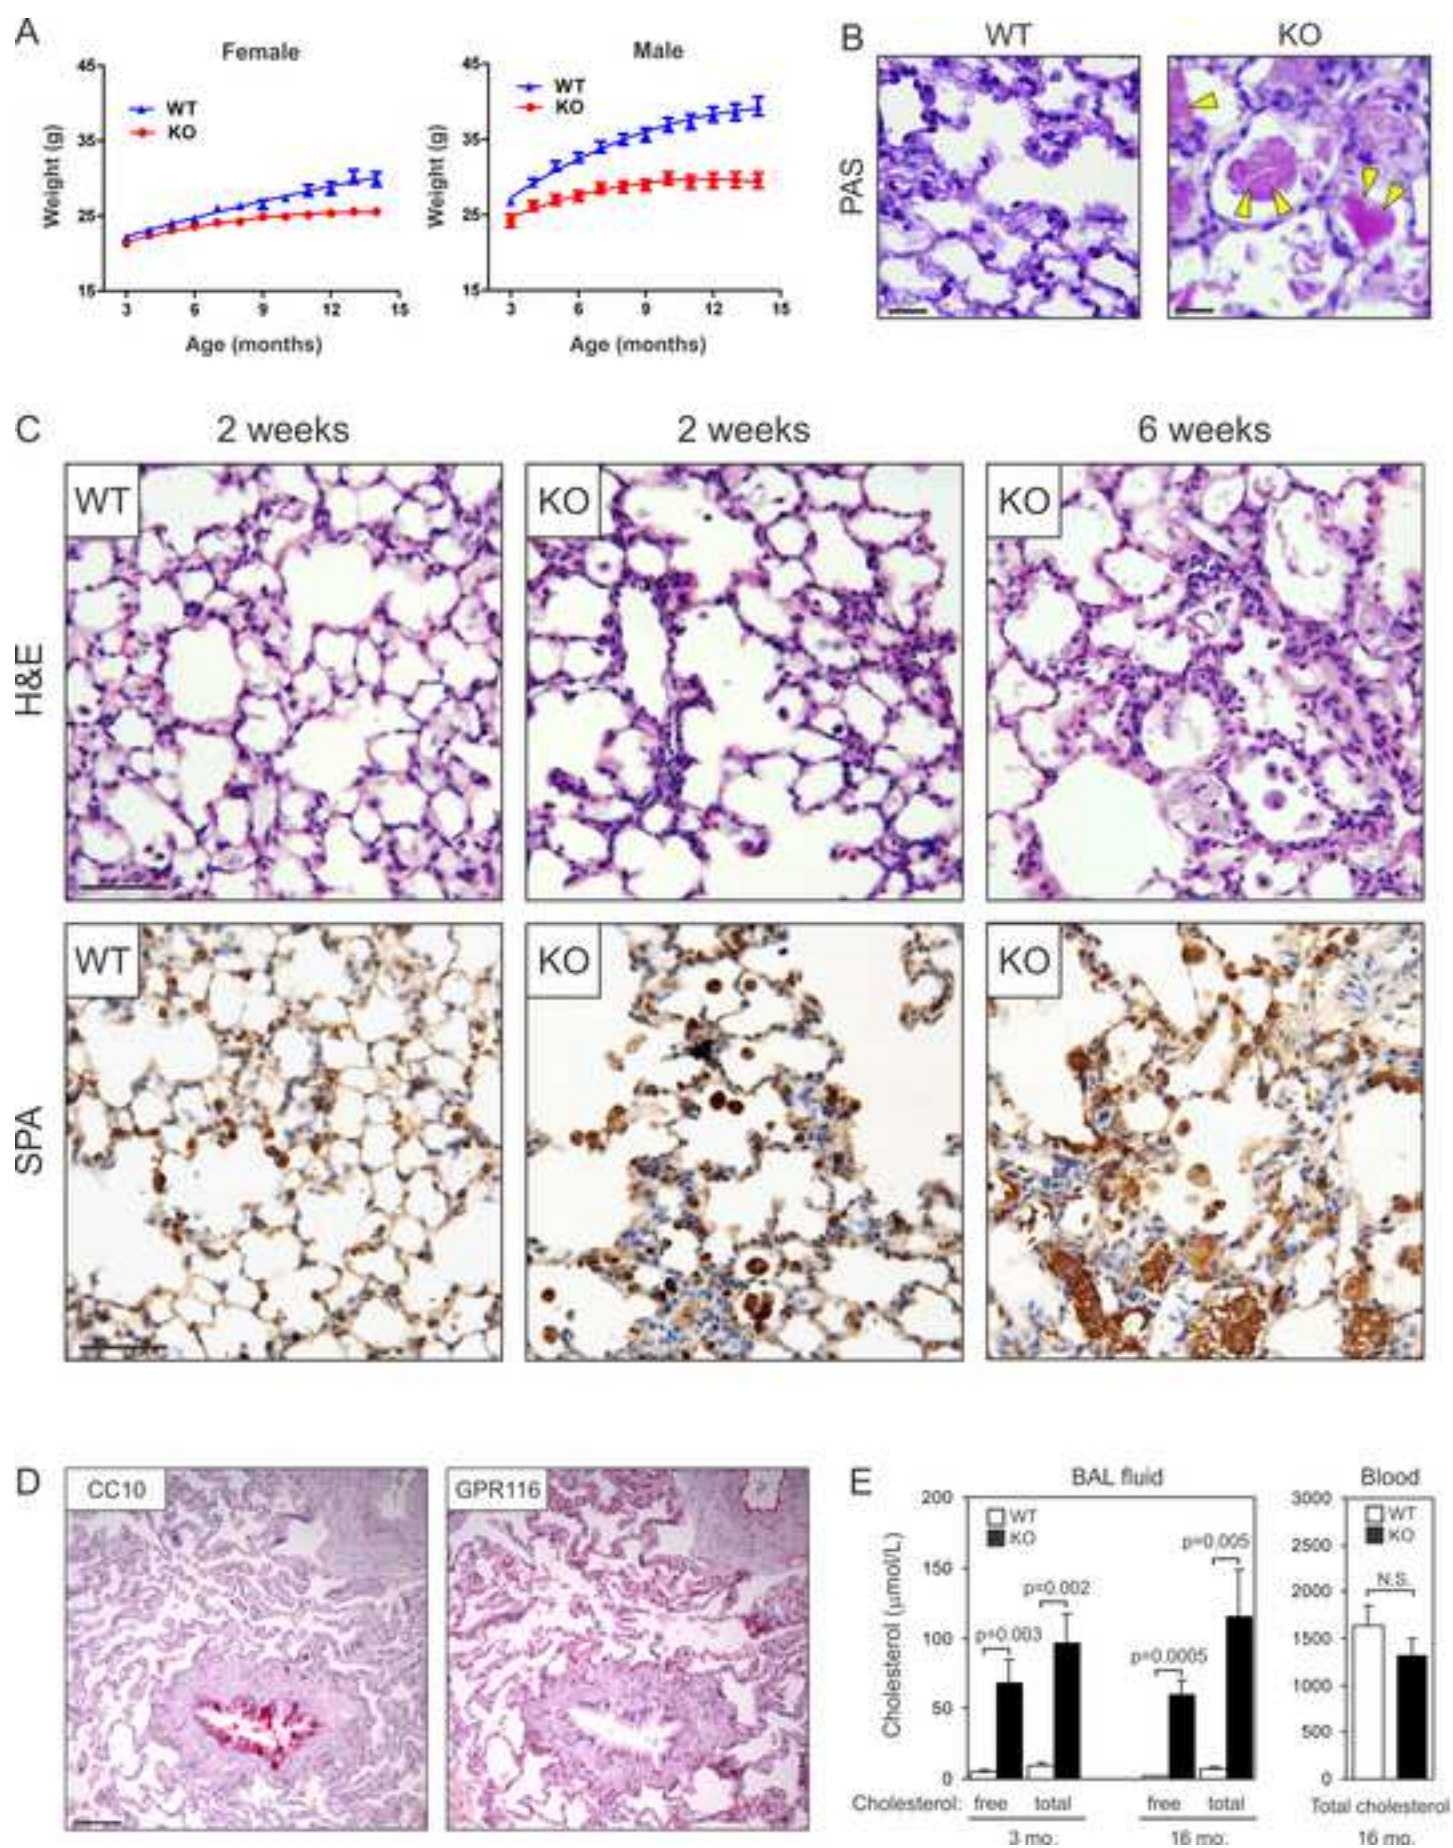



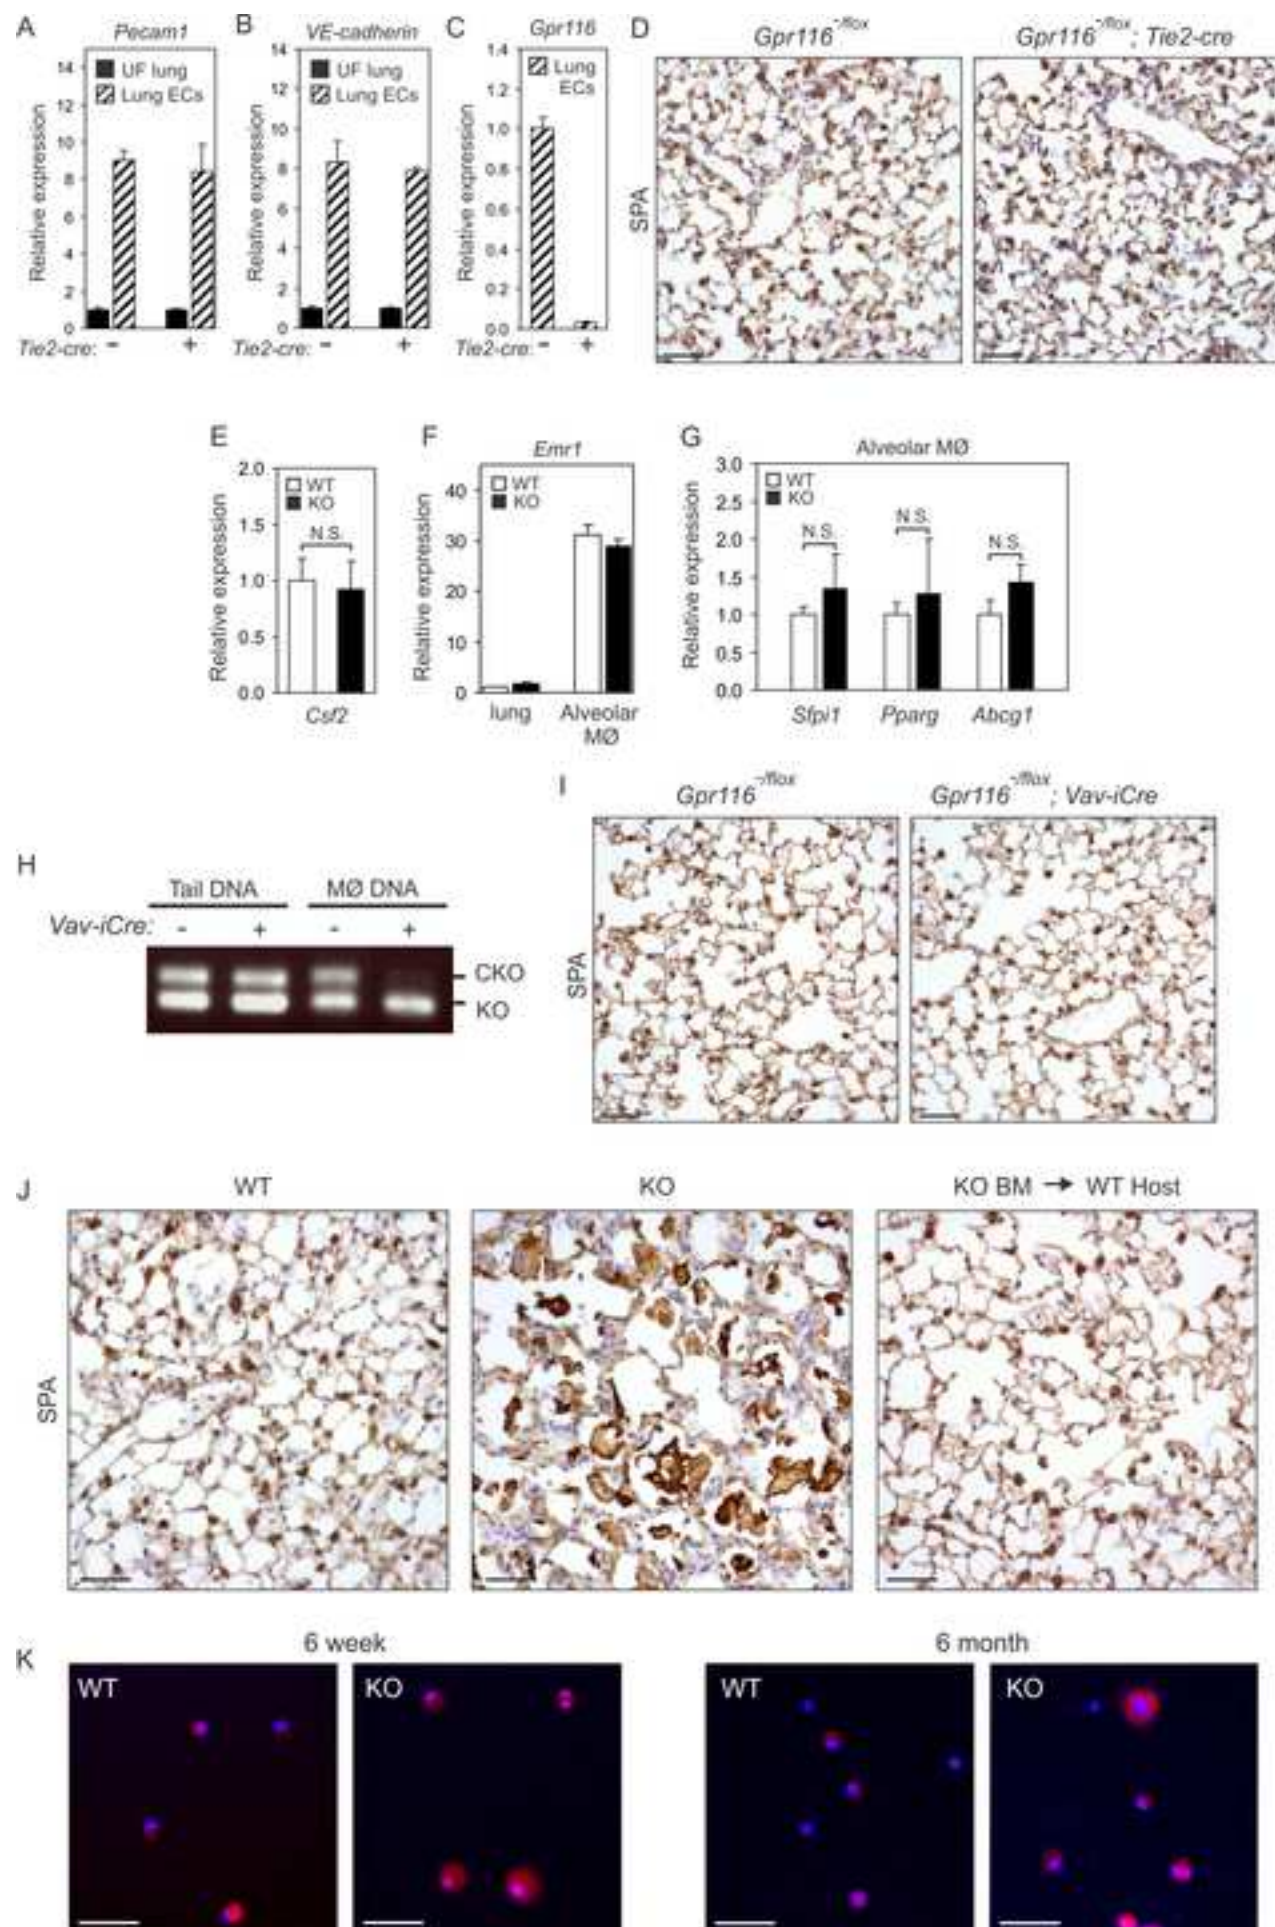

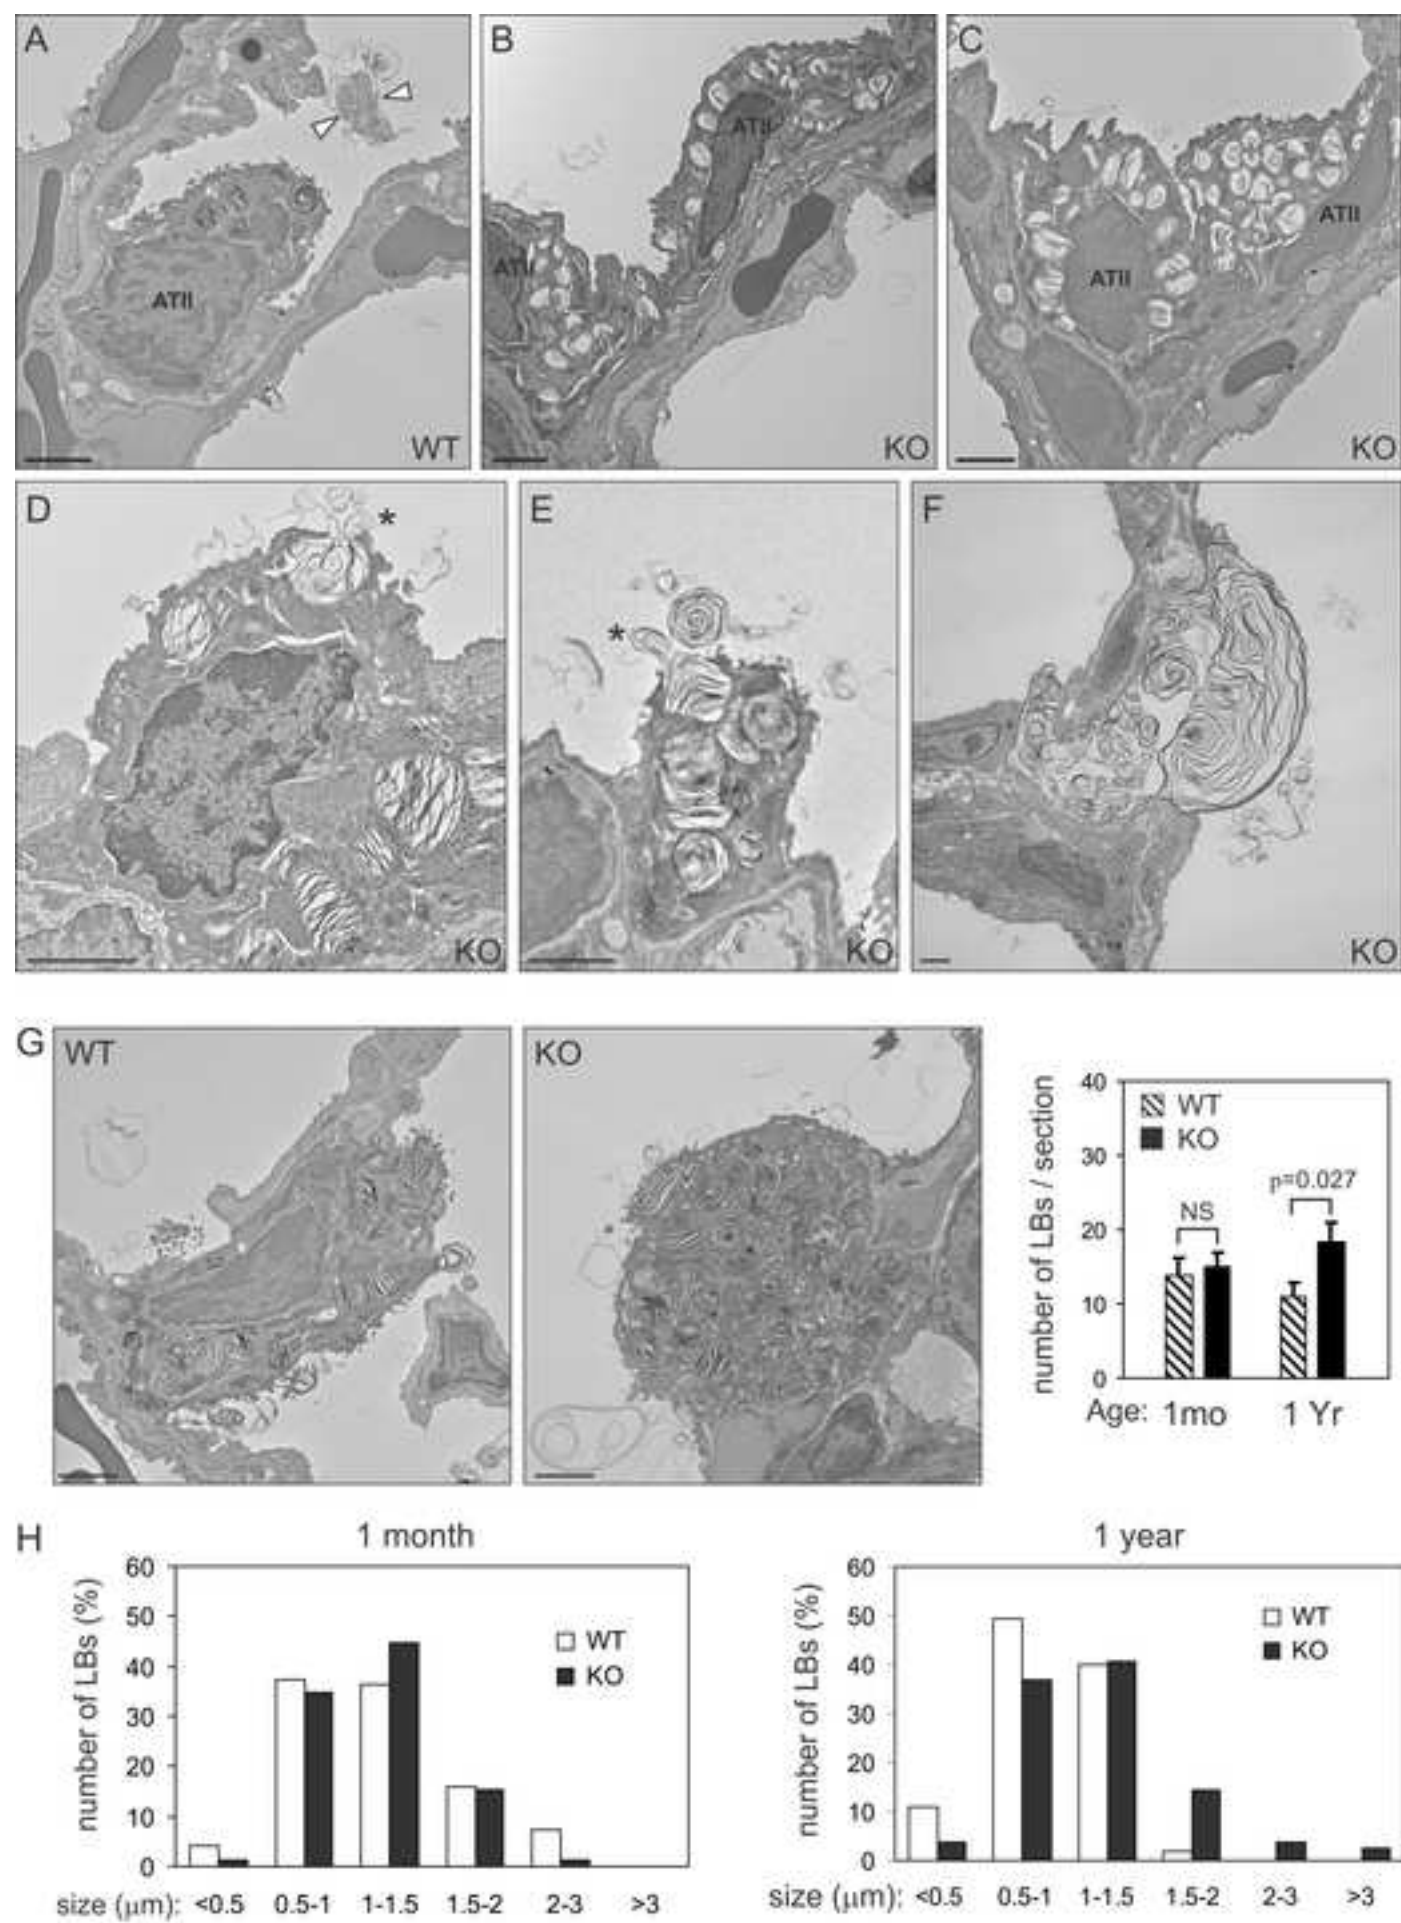

Supplement: NIHMS472538-supplement-02.pdf [file NIHMS472538-supplement-02.pdf]
